# Supplementary material for: Microhydration effects on the structures and electrophilic properties of cytidine
Source: Royal Society of Chemistry journal article supplement (doi:10.1039/c6ra11720a), 2016-01-01

## Microhydration effects on the structures and electrophilic properties of cytidine

Peng Shao<sup>a</sup>, Li-Ping Ding<sup>b,\*</sup>, Jiang-Tao Cai<sup>a</sup>, Cheng Lu<sup>c,\*</sup>, Bo Liu<sup>a</sup>, and Chang-Bo Sun<sup>a</sup>

<sup>a</sup>Department of Physics, Shaanxi University of Science & Technology, Xi'an 710021, China

<sup>b</sup>Department of Optoelectronic Science & Technology, College of Electrical & Information Engineering, Shaanxi University of Science & Technology, Xi'an 710021, China

<sup>c</sup>Beijing Computational Science Research Center, Beijing, 100084, China

**Table S1.** Relative energies ( $\Delta E$ ), vertical electron affinities (VEAs), vertical detachment energies (VDEs), hydration energies ( $E_{\text{hyd}}$ ) and intermolecular contacts for the neutral and anionic monohydrated cytidine.

| Structure | $\Delta E$ (eV) | VEA (eV) | $E_{\text{hyd}}$ (kcal mol <sup>-1</sup> ) | Intermolecular contacts                                                          |
|-----------|-----------------|----------|--------------------------------------------|----------------------------------------------------------------------------------|
| Cw-Na     | 0.00            | -0.41    | 13.22                                      | N <sub>3</sub> ⋯H <sub>w</sub> -O <sub>w</sub> ⋯H-N <sub>4</sub>                 |
| Cw-Nb     | 0.16            | -0.57    | 9.43                                       | H <sub>w</sub> -O <sub>w</sub> ⋯H-O <sub>5'</sub>                                |
| Cw-Nc     | 0.18            | -0.62    | 9.17                                       | O <sub>4'</sub> -H <sub>w</sub> ⋯O <sub>w</sub> -H⋯O <sub>5'</sub>               |
| Cw-Nd     | 0.19            | -0.46    | 8.98                                       | O <sub>2</sub> ⋯H <sub>w</sub> -O <sub>w</sub> ⋯H-O <sub>2'</sub>                |
| Cw-Ne     | 0.21            | -0.77    | 8.52                                       | N <sub>4</sub> -H⋯O <sub>w</sub>                                                 |
| Structure | $\Delta E$ (eV) | VDE (eV) | $E_{\text{hyd}}$ (kcal mol <sup>-1</sup> ) | Intermolecular contacts                                                          |
| Cw-Aa     | 0.00            | 1.42     | 17.29                                      | N <sub>3</sub> ⋯H <sub>w</sub> -O <sub>w</sub> ⋯H-N <sub>4</sub>                 |
| Cw-Ab     | 0.06            | 1.44     | 15.90                                      | O <sub>2</sub> ⋯H <sub>w</sub> -O <sub>w</sub> -H <sub>w</sub> ⋯N <sub>3</sub>   |
| Cw-Ac     | 0.16            | 1.32     | 13.41                                      | O <sub>3'</sub> ⋯H <sub>w</sub> -O <sub>w</sub> -H <sub>w</sub> ⋯O <sub>4'</sub> |
| Cw-Ad     | 0.17            | 1.33     | 13.37                                      | O <sub>2</sub> ⋯H <sub>w</sub> -O <sub>w</sub> -H <sub>w</sub> ⋯O <sub>2'</sub>  |
| Cw-Ae     | 0.22            | 1.39     | 12.16                                      | N <sub>4</sub> ⋯H <sub>w</sub> -O <sub>w</sub>                                   |

\*Correspondence to: Li-Ping Ding, Shaanxi University of Science & Technology, Xi'an 710021, China.  
E-mail address: scu\_ding@163.com (Li-Ping Ding), lucheng@calypso.cn (Cheng Lu)

**Fig. S1.** Molecular structures for cytidine monohydrates (first line) and their anions (second line), with intermolecular distances in angstrom.

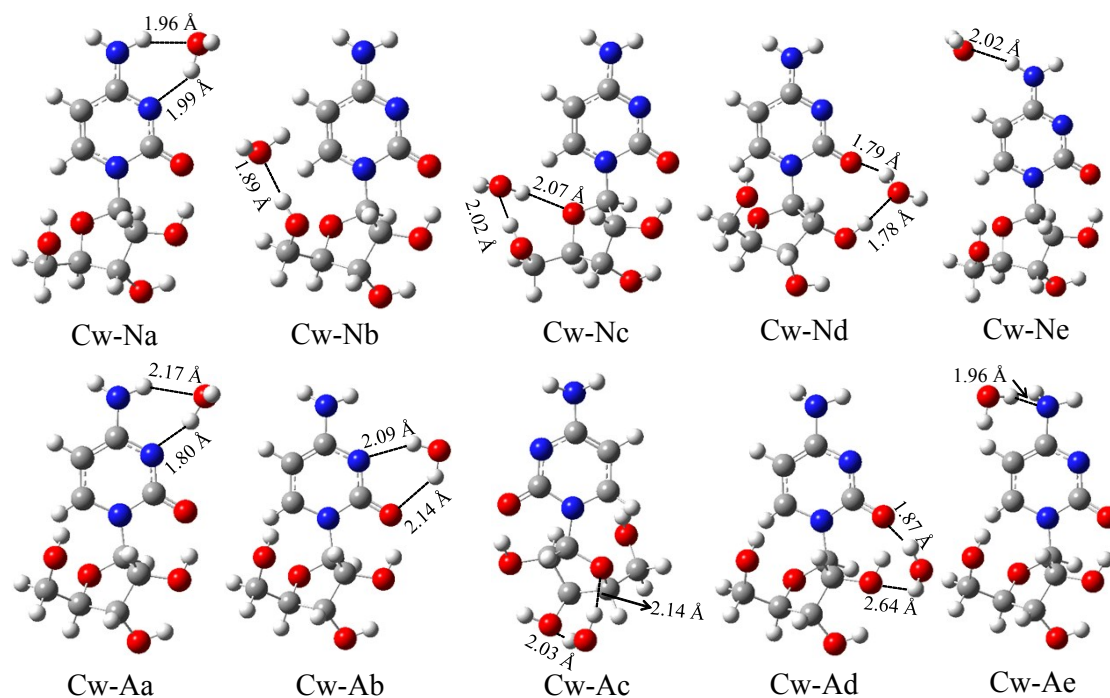

**Fig.S2.** The selected low-lying structures for cytidine dihydrates (first line) and their anions (second line). The blue, red, grey and white balls represent N, O, C and H atoms, respectively.

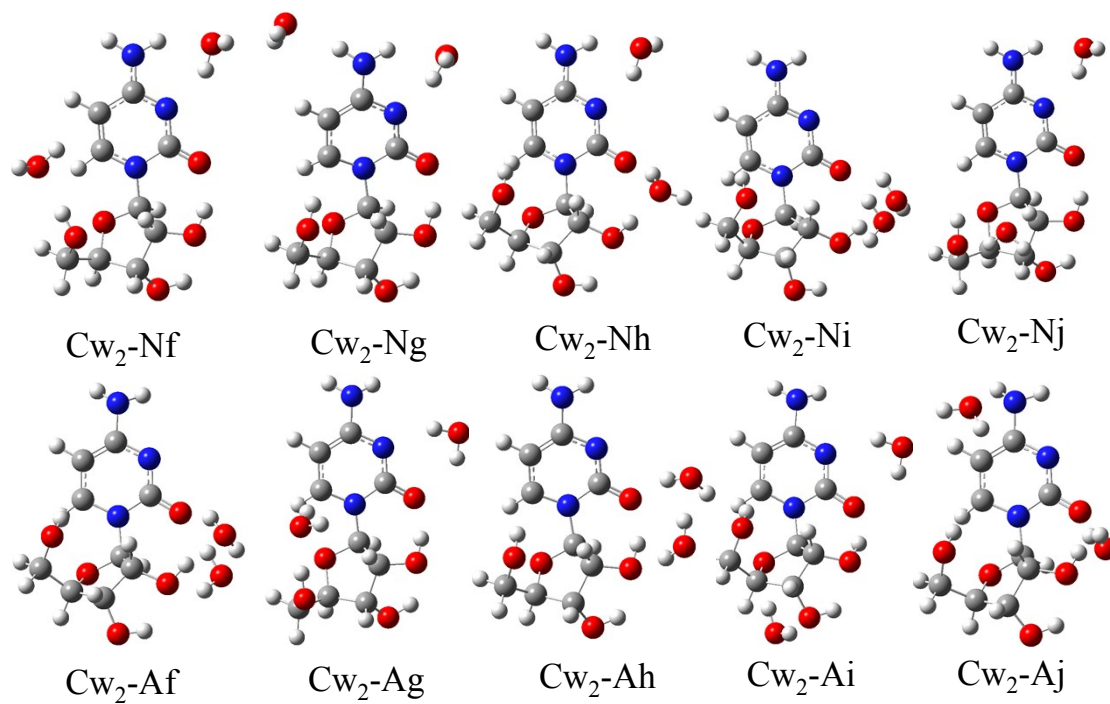

**Fig.S3.** The selected low-lying structures for cytidine trihydrates (first line) and their anions (second line). The blue, red, grey and white balls represent N, O, C and H atoms, respectively.

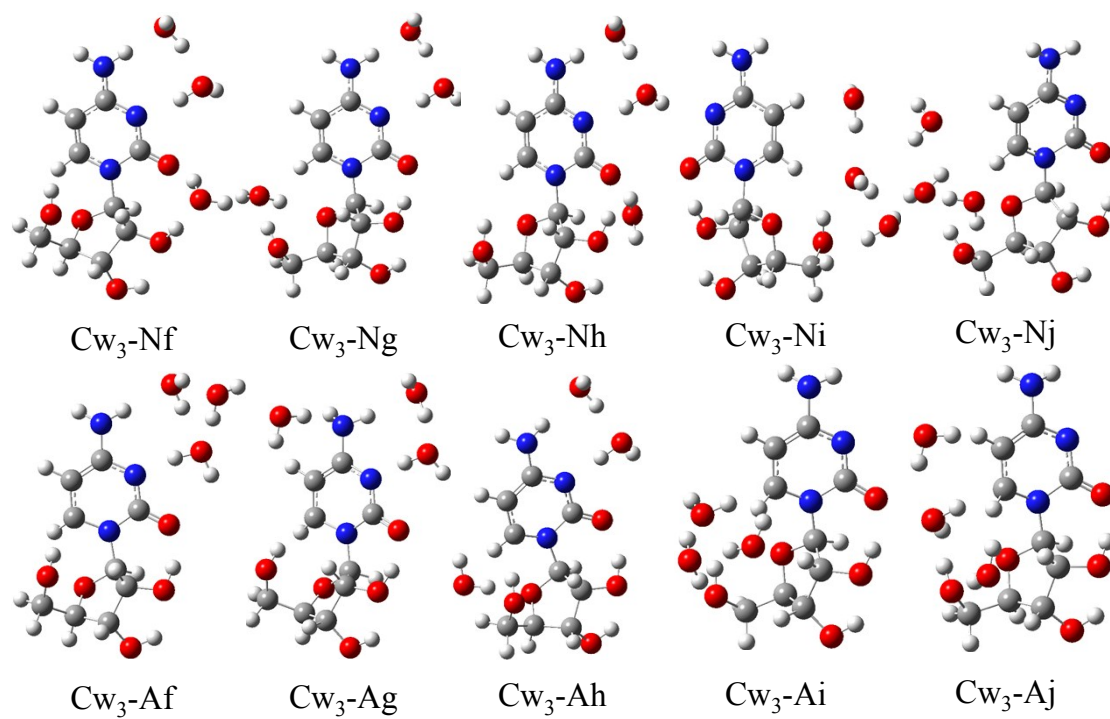

**Fig.S4.** The selected low-lying structures for cytidine tetrahydrates (first line) and their anions (second line). The blue, red, grey and white balls represent N, O, C and H atoms, respectively.

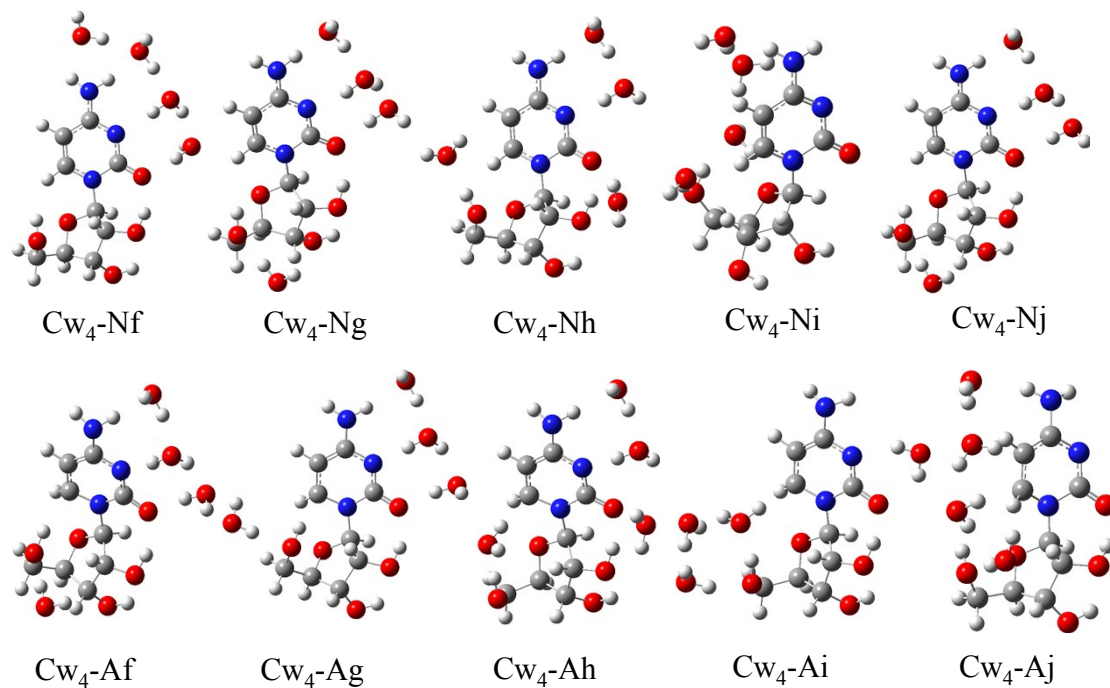

**Fig. S5.** Singly occupied molecular orbitals (SOMOs) for the anions of cytidine and its monohydrates.

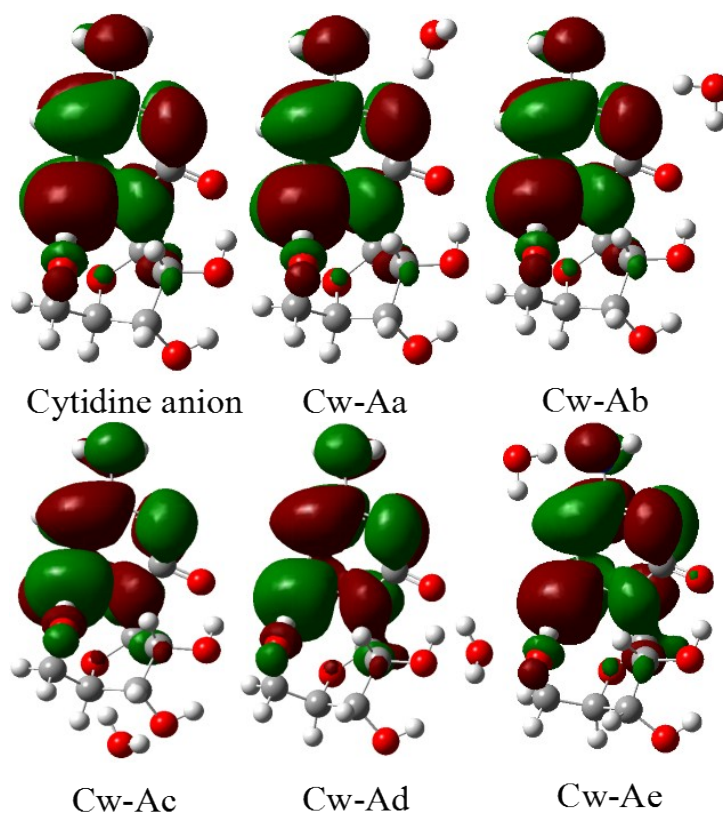

**Fig. S6.** Charge distributions in the first two lowest energy structures of cytidine dihydrates and their anions.

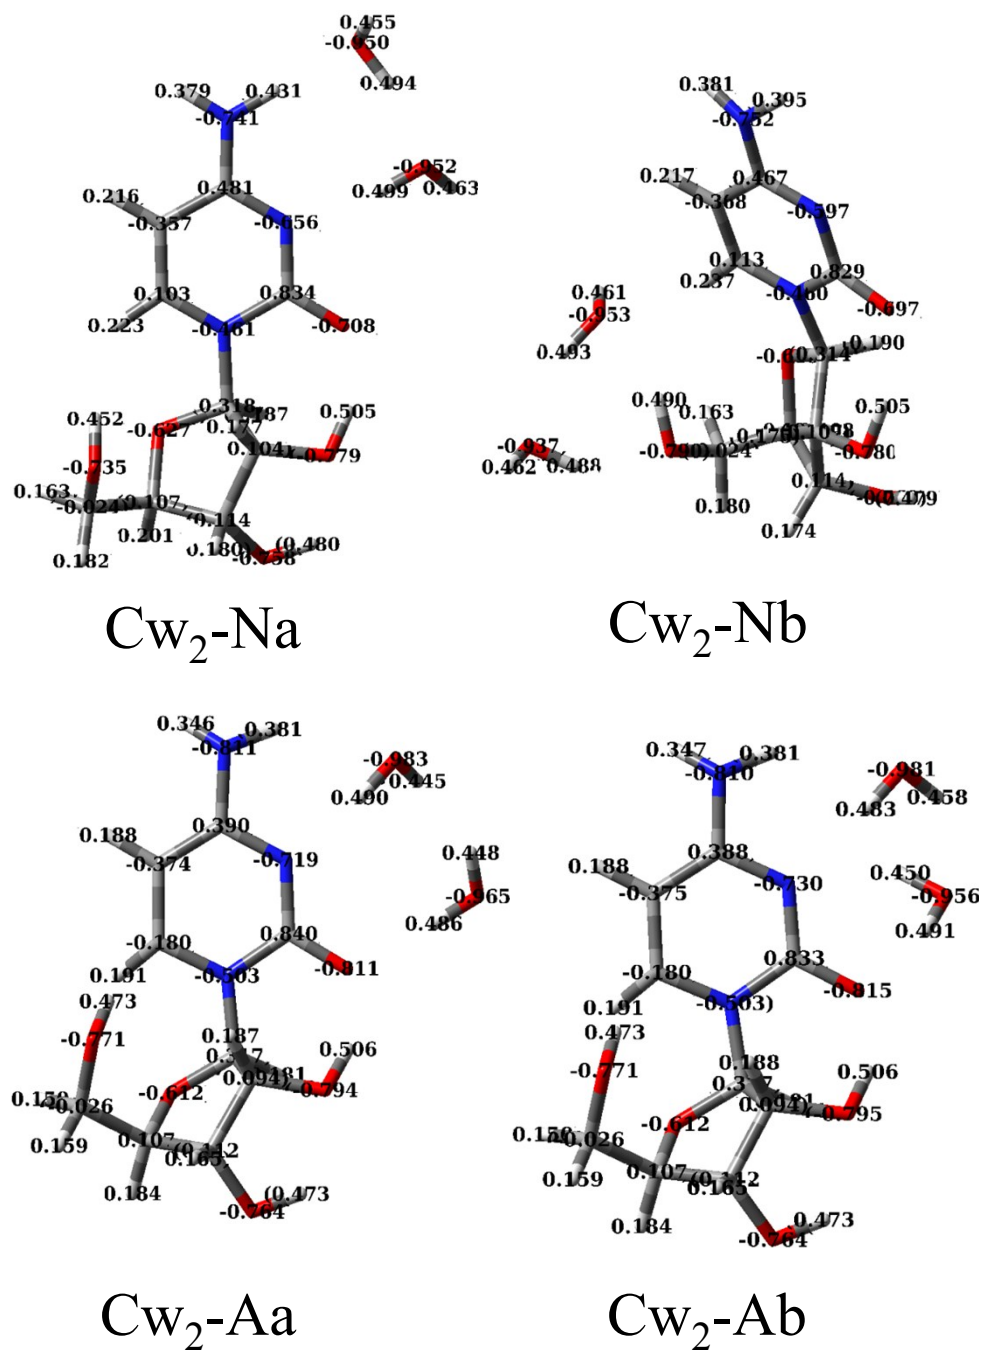

**Fig. S7.** Charge distributions in the first two lowest energy structures of cytidine trihydrates and their anions.

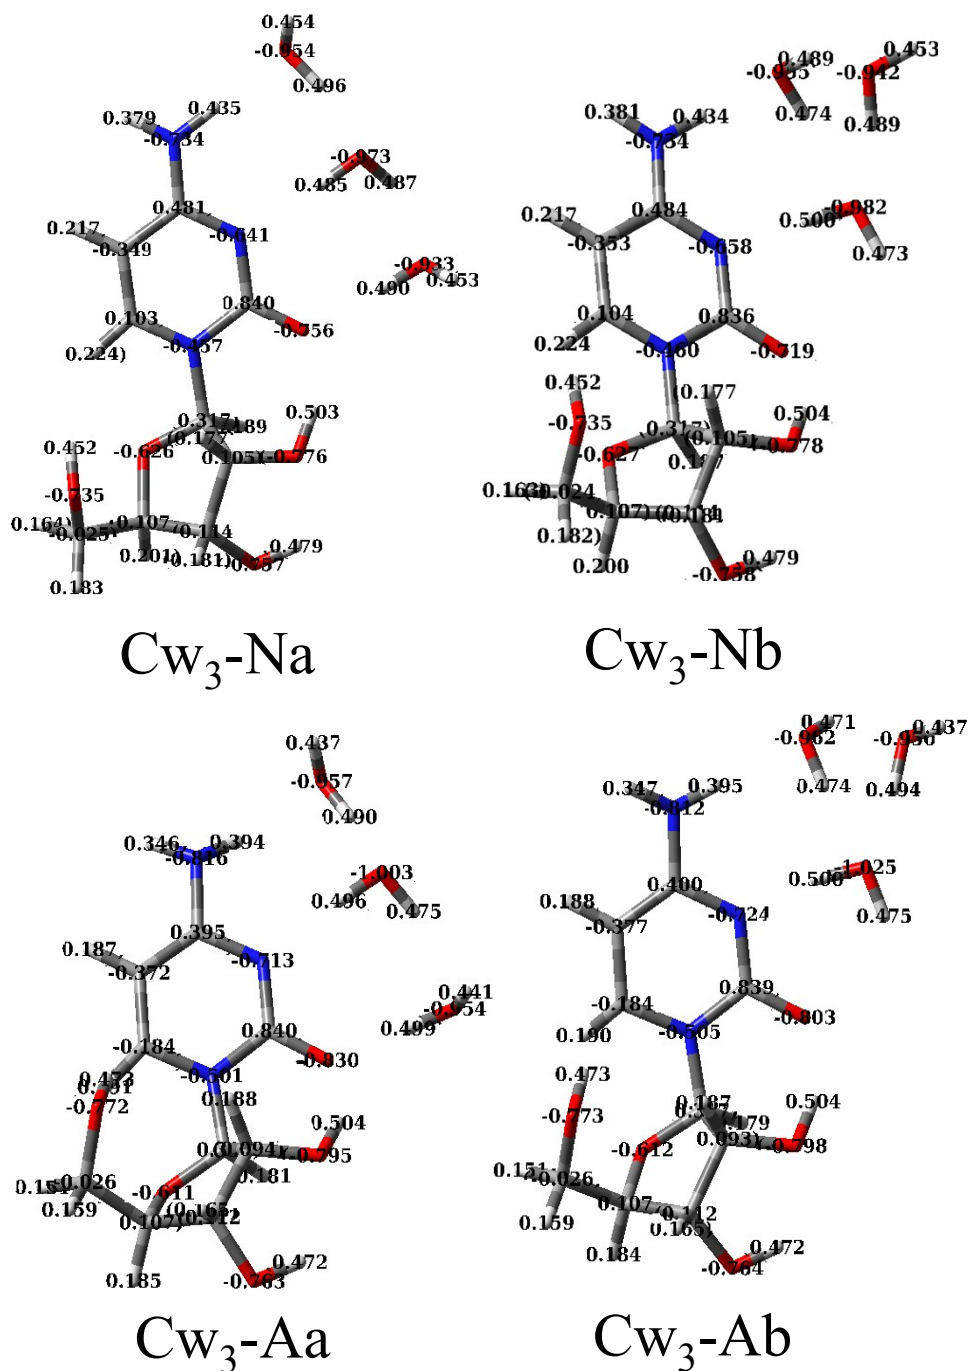



**Fig. S8.** Charge distributions in the first two lowest energy structures of cytidine tetrahydrates and their anions.

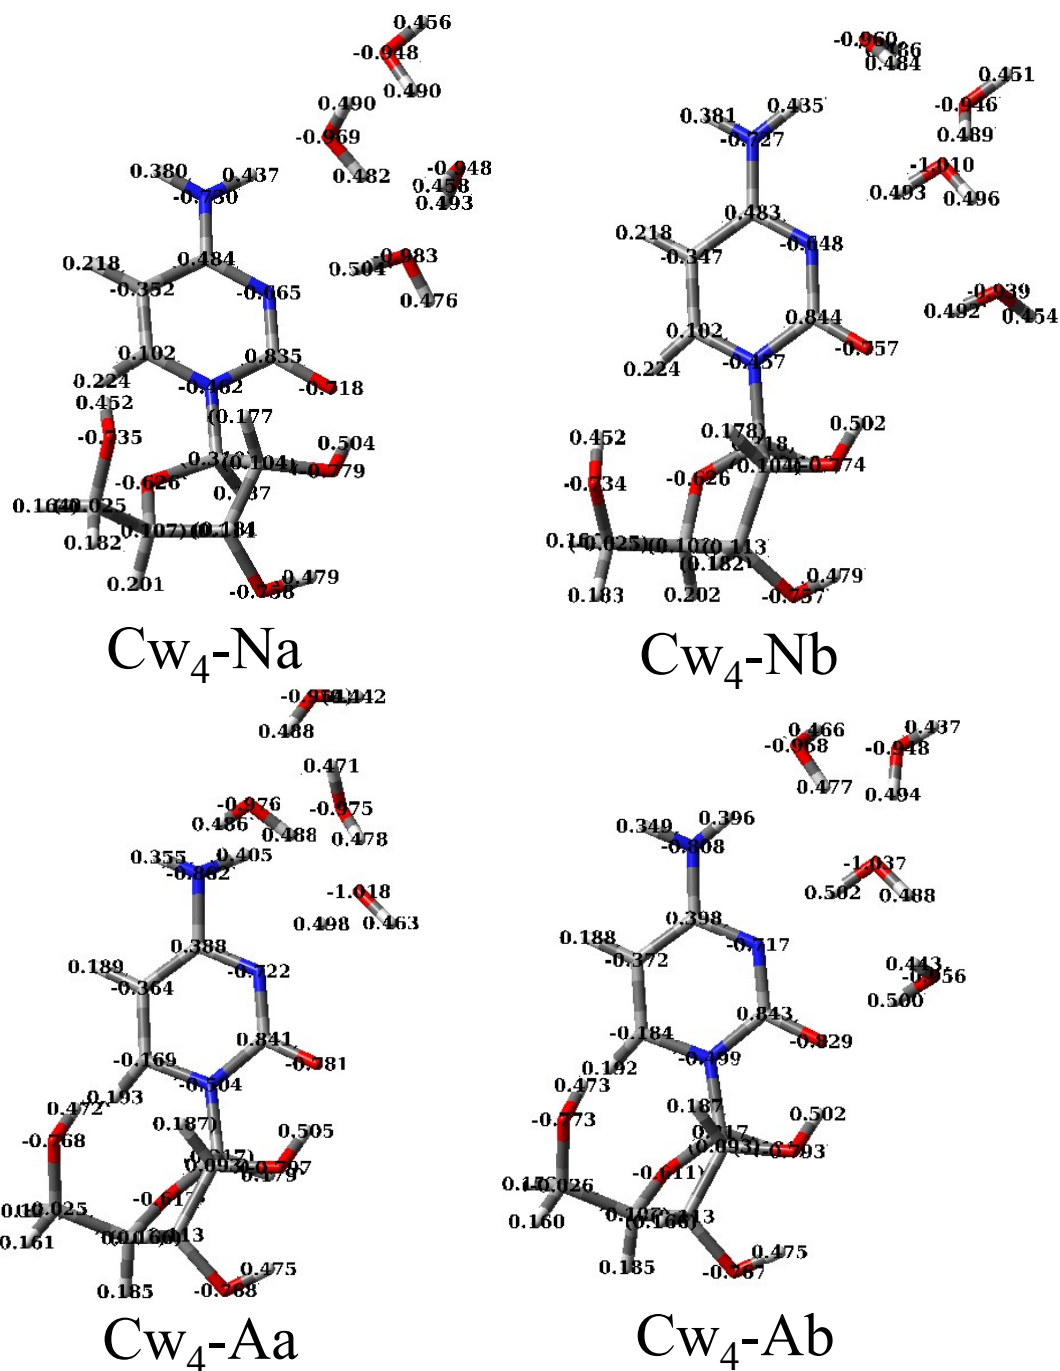

**Fig. S9.** Charge distributions in neutral and anionic cytidine and their lowest energy monohydrates.

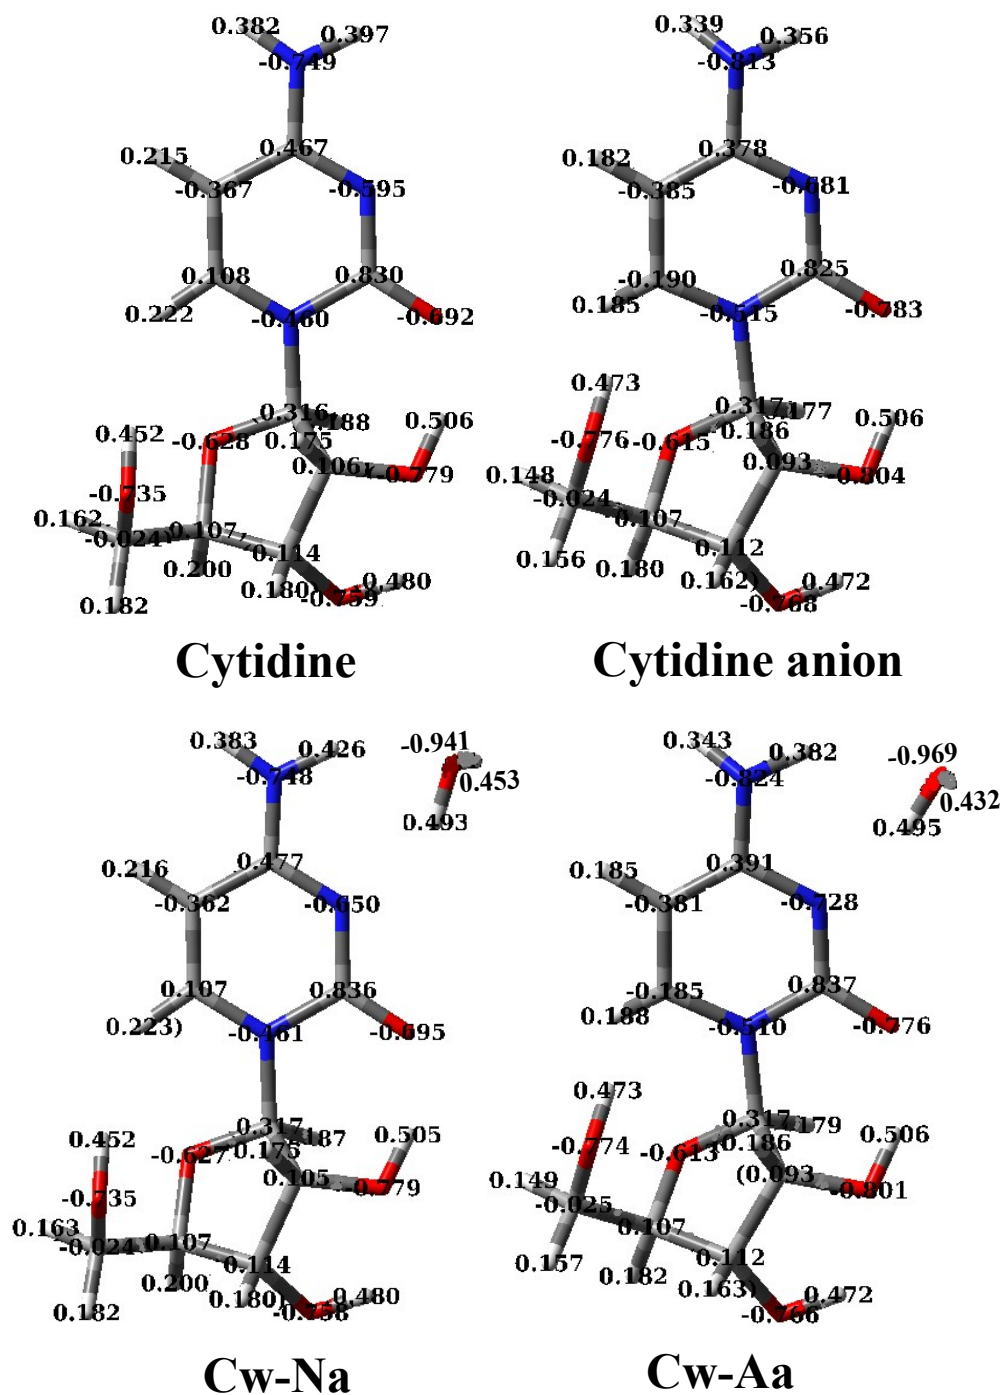

**Fig. S10.** The transition processes for one isomer to another for the  $Cw_2$ -Na isomer.

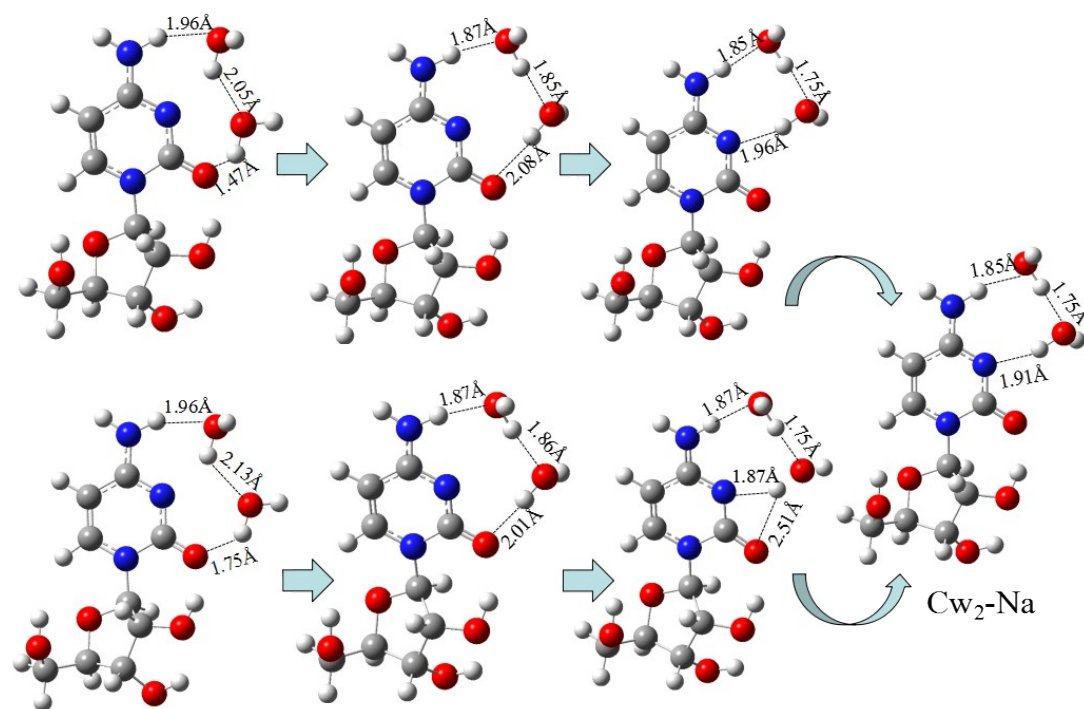

Supplement: c6ra11720a1.pdf [file c6ra11720a1.pdf]
